# Supplementary material
Source: MDPI journal article supplement (https://www.mdpi.com/2073-4441/14/16/2490)
Supplement: s1 [file s1]

Table S1: Matching subbasins from the SWAT model with stretches from the temperature study, groundwater contribution after Kaule and Gilfedder (2021) (GW) where applicable and BFI calculated based on the simulated outflow for different time periods: mean over the whole period (excluding warm-up), and summer (su) 2018, 2019 and 2020.

| Stretch     | EB1  | EB1  | HB1  | HB2-<br>HB1 | HB3-<br>HB2 | MB1  | MB1  | MB2-<br>MB1 | MB3-<br>MB2 | MB4-<br>MB3 | BB2-<br>BB1 | BB4-<br>BB2 | BB5-<br>BB4 |
|-------------|------|------|------|-------------|-------------|------|------|-------------|-------------|-------------|-------------|-------------|-------------|
| Subbasin    | 1    | 2    | 7    | 11          | 23          | 28   | 35   | 31          | 30          | 18          | 70          | 53          | 45          |
| GW          | -    | -    | -    | -           | low         | high | high | high        | high        | low         | -           | -           | -           |
| Mean BFI    | 0.86 | 0.85 | 0.82 | 0.85        | 0.83        | 0.82 | 0.74 | 0.79        | 0.80        | 0.81        | 0.69        | 0.67        | 0.69        |
| BFI su 2018 | 0.72 | 0.72 | 0.72 | 0.73        | 0.81        | 0.98 | 0.94 | 0.96        | 0.95        | 0.94        | 0.95        | 0.91        | 0.91        |
| BFI su 2019 | 0.97 | 0.97 | 0.94 | 0.96        | 0.92        | 0.99 | 0.97 | 0.98        | 0.97        | 0.96        | 0.91        | 0.87        | 0.88        |
| BFI su 2020 | 0.61 | 0.58 | 0.53 | 0.58        | 0.57        | 0.67 | 0.47 | 0.56        | 0.59        | 0.58        | 0.45        | 0.40        | 0.43        |
